# Supplementary material
Source: PubMed Central journal article supplement (PMC4332621)
Supplement: NIHMS613067-supplement-01.pdf [file NIHMS613067-supplement-01.pdf]

9. Petrache I, Fijalkowska I, Zhen L, et al. A novel antiapoptotic role for alpha1-antitrypsin in the prevention of pulmonary emphysema. *Am J Respir Crit Care Med* 2006; 173: 1222–1228.
10. Brantly M. Alpha1-antitrypsin: Not just an antiprotease: Extending the half-life of a natural anti-inflammatory molecule by conjugation with polyethylene glycol. *Am J Respir Cell Mol Biol* 2002; 27: 652–654.
11. Zhang B, Lu Y, Campbell-Thompson M, et al. Alpha1-antitrypsin protects beta-cells from apoptosis. *Diabetes* 2007; 56: 1316–1323.
12. Koulmanda M, Bhasin M, Fan Z, et al. Alpha 1-antitrypsin reduces inflammation and enhances mouse pancreatic islet transplant survival. *Proc Natl Acad Sci U S A* 2012; 109: 15443–15448.
13. O'Neil JJ, Tchipashvili V, Parent RJ, et al. A simple and cost-effective method for the isolation of islets from nonhuman primates. *Cell Transplant* 2003; 12: 883–890.
14. Gray DW. Islet isolation and transplantation techniques in the primate. *Surg Gynecol Obstet* 1990; 170: 225–232.
15. Kauffmann A, Gentleman R, Huber W. arrayQualityMetrics—A bioconductor package for quality assessment of microarray data. *Bioinformatics* 2009; 25: 415–416.
16. Alejandro R, Cutfield RG, Shienvold FL, et al. Natural history of intrahepatic canine islet cell autografts. *J Clin Invest* 1986; 78: 1339–1348.
17. Warnock GL, Cattral MS, Rajotte RV. Normoglycemia after implantation of purified islet cells in dogs. *Can J Surg* 1988; 31: 421–426.
18. Oberholzer J, Triponez F, Lou J, Morel P. Clinical islet transplantation: A review. *Ann N Y Acad Sci* 1999; 875: 189–199.
19. Koulmanda M, Bhasin M, Hoffman L, et al. Curative and beta cell regenerative effects of alpha1-antitrypsin treatment in autoimmune diabetic NOD mice. *Proc Natl Acad Sci U S A* 2008; 105: 16242–16247.
20. Petrache I, Hajjar J, Campos M. Safety and efficacy of alpha-1-antitrypsin augmentation therapy in the treatment of patients with alpha-1-antitrypsin deficiency. *Biolog: Targets Ther* 2009; 3: 193–204.

## Supporting Information

Additional Supporting Information may be found in the online version of this article.

**Figure S1: Network analysis of AAT regulated genes in islets.** (A) Merged network of connective tissue and immune system related network. (B) Merged network of cell development, growth and movement-related networks. The Ingenuity Pathways Analysis (IPA) tool was used to generate the networks from the differentially expressed genes. The intensity of the node color indicates the degree of up-regulation (red) and down-regulation (green) in islets from AAT as compared to control recipient host. The core regulatory genes of the network are shown in bold line in the center of network.

**Table S1:** Summary for the purity, viability, total islet numbers and IEQ of prepared islets for transplantation. The purity, viability and IEQ were analyzed on days 1 and 0 (day of the transplant). This table reflects the results from the day of islet transplantation. These methods have been our standard practice for the past 20 years in nonhuman primate islet transplant experiments (13). We found about 10% of our islets undergo apoptosis and die in the overnight culture period.
